# Supplementary material for: Design and validation of a simulated multitasking environment for assessing the cognitive load on the infantry squad leader
Source: Front Psychol. 2024 Aug 27;15:1433822. doi: 10.3389/fpsyg.2024.1433822 (PMC11385692; doi:10.3389/fpsyg.2024.1433822)
Supplement: Supplementary file 4 [file Table_4.XLSX]

## Sheet: Experiment 1 - task performance
Experiment 1 - task performance
	T1: rate of correct responses			T2: mean angular error			T3: rate of correct answers			T4: success rate
Participants	T1_low	T1_medium	T1_high	T2_low	T2_medium	T2_high	T3_low	T3_medium	T3_high	T4_low	T4_medium	T4_high	Average T1	Average T2	Average T3	Averate T4	Average of the 12 conditions
1	0.7	0.7	0.7625	51.20730955	40.55503361	42.17769068	1	0.866666667	0.666666667	0.625	0.9	0.305555555	0.772916667	0.850918794	0.844444445	0.610185185	0.769616273
2	0.8	0.9	0.8125	19.52515359	31.32243968	43.82689684	0.933333333	1	0.533333333	0.875	0.866666667	0.416666666	0.793055556	0.972525794	0.888888889	0.874074074	0.882136078
3	0.8	0.9	0.8625	14.43763459	15.17387081	31.65344924	1	0.866666667	0.6	0.958333333	0.8	0.527777778	0.852083333	0.94926954	0.777777778	0.853703704	0.858208589
4	0.7	0.883333333	0.7	78.58775714	81.29730093	81.17639153	1	1	0.466666667	0.875	0.866666667	0.527777778	0.611111111	0.761577131	0.933333333	0.557407407	0.715857246
5	0.8	0.616666667	0.6	72.72042794	81.22015189	86.13244131	1	0.933333333	0.8	0.958333333	0.933333333	0.666666667	0.704166667	0.915525246	0.822222222	0.625	0.766728534
6	0.866666667	0.766666667	0.825	78.67649032	96.6473825	95.55698609	1	0.933333333	0.8	0.916666667	0.766666667	0.583333334	0.725694445	0.858834248	0.844444445	0.678703704	0.77691921
7	0.6	0.733333333	0.6625	92.09947036	112.4752921	81.93615887	0.933333333	1	0.8	0.666666667	0.8	0.194444444	0.845138889	0.761637551	0.866666667	0.761111111	0.808638554
8	0.8	0.783333333	0.75	79.90076118	90.30213964	89.83641968	1	0.866666667	0.733333333	0.875	0.8	0.444444444	0.75	0.840150852	0.955555556	0.70462963	0.812584009
9	0.933333333	0.883333333	0.9	10.51710624	20.48999239	14.16885039	1	0.933333333	0.8	0.916666667	0.966666667	0.416666666	0.645833333	0.757215658	0.933333333	0.789814815	0.781549285
10	0.666666667	0.816666667	0.7375	7.654003073	11.77153543	10.24660396	0.866666667	1	0.8	1	0.9	0.722222222	0.879861111	0.882832853	0.822222222	0.719444444	0.826090158
11	0.866666667	0.75	0.85	10.41993203	21.79018919	22.57877505	1	0.8	0.533333333	1	0.866666667	0.694444445	0.894444444	0.938887225	0.822222222	0.762037037	0.854397732
12	0.6	0.433333333	0.65	77.44705105	94.43397	80.87883518	1	0.933333333	0.866666667	0.583333334	0.7	0.388888889	0.817361111	0.769219197	0.822222222	0.756481482	0.791321003
13	0.666666667	0.5	0.5625	13.73061675	22.80712262	26.27394258	0.933333333	0.666666667	0.866666667	0.625	0.833333334	0.416666666	0.727777778	0.773324201	0.911111111	0.852777778	0.816247717
14	0.6	0.766666667	0.6125	34.59407411	40.74808236	43.55909739	1	0.866666667	0.666666667	0.875	0.633333334	0.527777778	0.836805556	0.744798425	0.911111111	0.755555556	0.812067662
15	0.933333333	0.9	0.6	87.13706055	56.62109007	80.17705405	1	0.866666667	0.733333333	0.916666667	0.866666667	0.5	0.717361111	0.73471211	0.911111111	0.553703704	0.729222009
16	0.633333333	0.666666667	0.7375	34.36411594	66.33512043	40.07181455	1	1	0.866666667	0.791666667	0.766666667	0.555555556	0.84375	0.702774914	0.866666667	0.706481481	0.779918265
17	0.6	0.683333333	0.5125	79.9097429	91.80027704	65.12112965	1	0.866666667	0.933333333	0.958333333	0.966666667	0.444444444	0.925	0.95059466	0.911111111	0.766666667	0.888343109
