# Supplementary material for: Design and validation of a simulated multitasking environment for assessing the cognitive load on the infantry squad leader
Source: Front Psychol. 2024 Aug 27;15:1433822. doi: 10.3389/fpsyg.2024.1433822 (PMC11385692; doi:10.3389/fpsyg.2024.1433822)
Supplement: Supplementary file 5 [file Table_5.XLSX]

## Sheet: Experiment 1 -DRT detection rat
DRT detection rate and reaction time
Participants	T1_low_reaction_time	T1_low_detection_rate	T1_medium_reaction_time	T1_medium_detection_rate	T1_high_reaction_time	T1_high_detection_rate	T2_low_reaction_time	T2_low_detection_rate	T2_medium_reaction_time	T2_medium_detection_rate	T2_high_reaction_time	T2_high_detection_rate	T3_low_reaction_time	T3_low_detection_rate	T3_medium_reaction_time	T3_medium_detection_rate	T3_high_reaction_time	T3_high_detection_rate	T4_low_reaction_time	T4_low_detection_rate	T4_medium_reaction_time	T4_medium_detection_rate	T4_high_reaction_time	T4_high_detection_rate
1	463.7714286	0.97260274	503.8591549	0.934210526	772.6478873	0.973333333	669.9594595	0.962025316	634.0344828	0.769230769	689.2666667	0.84	456.5652174	0.923076923	714.8448276	0.759493671	634.4142857	0.9125	932.5428571	0.533333333	656.24	0.351351351	677	0.4
2	550.1369863	0.986666667	418.7027027	1	561.3013699	0.986666667	509.7222222	0.949367089	510.972973	0.986666667	786.8474576	0.884615385	357.0897436	0.987341772	456.9873418	1	374.1139241	1	563.902439	0.635135135	740.9107143	0.789473684	939.7105263	0.605263158
3	349.6315789	1	326.2432432	0.986842105	334.0135135	0.986666667	317.8333333	1	358.6842105	1	336.3037975	1	343.7105263	1	421.8227848	1	339.7972973	0.986842105	454.5070423	0.948051948	745.7619048	0.860759494	661.2321429	0.853333333
4	410.3066667	0.986842105	421.1973684	0.987012987	479.6621622	1	400.3333333	0.987341772	551.5131579	1	563.7625	1	350.05	1	449.3	1	456.9615385	0.987341772	587.3939394	0.92	776.2857143	0.706666667	695.8983051	0.802631579
5	381.4189189	1	468.7123288	0.986666667	443.8767123	0.986486486	457.6582278	1	436.8378378	0.936708861	519.2328767	0.924050633	287.974359	1	387.9487179	0.987341772	485.7222222	0.923076923	539.3188406	0.896103896	611.3508772	0.815789474	754.3035714	0.763157895
6	548.4507042	0.97260274	554.6944444	0.947368421	682.9189189	0.973684211	716.3098592	0.91025641	759.4657534	0.961538462	802.5352113	0.96	545.6233766	0.987179487	598.1265823	0.975308642	729.2467532	0.9875	673.0298507	0.934210526	939.9333333	0.784810127	993.725	0.578947368
7	520.875	0.973333333	605.6849315	1	710.7671233	1	507.2	0.986842105	757.9305556	1	718.0273973	0.974358974	452.5866667	0.987179487	614.1139241	1	1140.375	0.197530864	786.8846154	0.453333333	889.7380952	0.644736842	1296.5	0.171052632
8	938.15	0.84	834.3943662	0.935064935	739.0384615	0.824324324	1111.08	0.435897436	1261.25	0.474358974	1246.054054	0.578947368	685.5945946	0.961538462	796	0.5875	773.4074074	0.784810127	918.46875	0.5	831.4444444	0.405405405	814.9642857	0.571428571
9	483.6438356	0.986486486	423.3947368	1	412.1232877	1	476.3417722	1	516.038961	1	535.0135135	0.986666667	463.8227848	0.9875	635.0289855	0.985714286	483.8611111	1	501.8630137	0.974025974	584.8732394	0.96	645.1698113	0.717948718
10	363.6891892	1	370.2597403	1	359.96	0.986842105	398.6075949	1	398.8378378	1	370.4230769	1	378.1666667	0.987341772	364.8831169	1	409.0921053	1	489.9558824	0.933333333	564.4477612	0.894736842	775.0434783	0.675675676
11	546.6266667	1	545.5	1	544.84	1	637.9342105	1	628.7066667	1	768.1	0.922077922	566.7974684	1	532.1923077	0.987341772	567.6883117	0.975308642	763.2173913	0.921052632	714.0178571	0.789473684	764.3478261	0.649350649
12	451.6849315	0.986486486	573.6986301	0.986486486	755.9726027	1	497.9466667	0.987012987	607.1666667	0.961038961	462.6575342	0.986666667	549.1265823	1	584.4473684	0.962025316	839.3684211	0.769230769	839.4054054	0.525641026	952.9487179	0.58974359	801.4489796	0.802631579
13	513.9866667	0.986842105	658.1351351	0.973684211	553.984127	0.905405405	651.3142857	0.91025641	677.1690141	0.948717949	870.046875	0.881578947	561.7631579	0.962025316	656.6818182	0.858974359	829.6610169	0.775	760.1515152	0.883116883	812.2181818	0.773333333	916.6530612	0.684210526
14	706.84375	0.891891892	1087.5625	0.714285714	980.78	0.8	942.9803922	0.714285714	1033.371429	0.513157895	1051.95	0.565789474	735	0.962025316	974.3958333	0.65	1070.040816	0.641025641	790.8717949	0.554054054	893.875	0.573333333	836.3111111	0.632911392
15	470.78125	0.878378378	672.7076923	0.921052632	905.1166667	0.934210526	857.5833333	0.857142857	755.4492754	0.924050633	849.2413793	0.828947368	520.4375	1	731.5616438	0.961038961	770.7017544	0.814814815	822.2777778	0.769230769	604.1944444	0.5	677.8292683	0.613333333
16	491.75	0.972972973	616.3835616	0.973333333	911.4029851	0.934210526	750.7692308	0.873417722	656.3913043	0.935064935	879.2295082	0.88	497.7922078	1	925.2941176	0.860759494	807.92	0.974683544	857.1875	0.558441558	748.4528302	0.730769231	903.1875	0.5625
17	615.7857143	0.96	752.8983051	0.88	751.5901639	0.934210526	821.9622642	0.7625	1201.466667	0.552631579	1048.611111	0.607594937	660.0377358	0.708860759	892.0344828	0.430379747	892.5471698	0.7125	670	0.605263158	970.2790698	0.671052632	1360.785714	0.27027027
